# Supplementary material for: First total synthesis of caerulomycin K: a case study on selective, multiple C–H functionalizations of pyridines
Source: Royal Society of Chemistry journal article supplement (doi:10.1039/d4ra00589a), 2024-01-01
Supplement: d4ra00589a1.pdf [file d4ra00589a1.pdf]

## Compound Characterization Checklist

- **Triphenyl(2-phenylpyridin-4-yl)phosphonium trifluoromethanesulfonate (2)**

This known compound was isolated and characterized by  $^1\text{H}$  NMR and  $^{31}\text{P}$  NMR, as reported in the literature.

- **Triphenyl(3-phenylpyridin-4-yl)phosphonium trifluoromethanesulfonate (5)**

This known compound was isolated and characterized by  $^1\text{H}$  NMR and  $^{31}\text{P}$  NMR, as reported in the literature.

- **4-methoxy-2-phenylpyridine (7)**

This known compound was isolated and characterized by  $^1\text{H}$  NMR, as reported in the literature.

- **2-phenylpyridine 1-oxide (1-O)**

This known compound was isolated and characterized by  $^1\text{H}$  NMR, as reported in the literature.

- **5-bromo-2-phenylpyridine**

This known compound was isolated and characterized by  $^1\text{H}$  NMR, as reported in the literature.

- **4-bromo-2-phenylpyridine**

This known compound was isolated and characterized by  $^1\text{H}$  NMR, as reported in the literature.

- **3-bromo-2-phenylpyridine**

This known compound was isolated and characterized by  $^1\text{H}$  NMR, as reported in the literature.

- **2-chloro-6-phenylpyridine (9)**

This known compound was isolated and characterized by  $^1\text{H}$  NMR, as reported in the literature.

- **4-chloro-2-phenylpyridine (11)**

This known compound was isolated and characterized by  $^1\text{H}$  NMR, as reported in the literature.

- **4-chloro-2-phenyl-6-(1,3,5-trioxan-2-yl)pyridine (12)**

This novel compound was isolated and characterized by  $^1\text{H}$  NMR and  $^{13}\text{C}$  NMR, as well as HRMS.

- **4-methoxy-2-phenyl-6-(1,3,5-trioxan-2-yl)pyridine (13)**

This novel compound was isolated and characterized by  $^1\text{H}$  NMR and  $^{13}\text{C}$  NMR, as well as HRMS.

- **Caerulomycin K**

This known compound was isolated and characterized by  $^1\text{H}$  NMR and  $^{13}\text{C}$  NMR, as reported in the literature.
